# Supplementary material for: Rescue of the MERTK phagocytic defect in a human iPSC disease model using translational read-through inducing drugs
Source: PubMed Central journal article supplement (PMC5427915; doi:10.1038/s41598-017-00142-7), 2017-03-03
Supplement: 41598_2017_142_MOESM1_ESM.pdf [file 41598_2017_142_MOESM1_ESM.pdf]

# Rescue of the MERTK phagocytic defect in a human iPSC disease model using translational read-through inducing drugs

---

Conor M. Ramsden<sup>1,2,3</sup>, Britta Nommiste<sup>1</sup>, Amelia Lane<sup>1</sup>, Amanda-Jayne F. Carr<sup>1</sup>, Michael B. Powner<sup>1,4</sup>, Matthew Smart<sup>1</sup>, Li Li Chen<sup>1</sup>, Manickam N. Muthiah<sup>2,3</sup>, Andrew R. Webster<sup>1,2</sup>, Anthony T. Moore<sup>1,2,5</sup>, Michael E. Cheetham<sup>1</sup>, Lyndon da Cruz<sup>1,2,3</sup>, Peter J. Coffey<sup>1,2,6,\*</sup>

<sup>1</sup> Department of Ocular Biology and Therapeutics (ORBIT), Institute of Ophthalmology, University College London, 11–43 Bath Street, London, EC1V 9EL, UK.

<sup>2</sup> NIHR Biomedical Research Centre at Moorfields Eye Hospital NHS Foundation Trust and UCL Institute of Ophthalmology, London, EC1V 2PD, UK.

<sup>3</sup> Moorfields Eye Hospital NHS Foundation Trust, 162 City Road, London, EC1V 2PD, UK.

<sup>4</sup> Division of Optometry and Visual Sciences, City, University of London, Northampton Square, London, EC1V 0HB, UK.

<sup>5</sup> UCSF School of Medicine, Koret Vision Center, 10 Koret Way, San Francisco, CA 94143, USA.

<sup>6</sup> Center for Stem Cell Biology and Engineering, NRI, UC Santa Barbara, USA.

\* Corresponding Author    email   [p.coffey@ucl.ac.uk](mailto:p.coffey@ucl.ac.uk)

tel:    +44 20 7608 4039

fax:    +44 20 7608 6929

Figure S1. Generation and characterisation of iPSC. A Schematic of a skin biopsy and biopsy preparation in a 10cm dish. B iPSC colonies developing from a fibroblast culture. C Purified iPSC colony. D Immunocytochemistry of a stem cell colony showing expression of typical stem cell markers. E Normal karyotype. F Taqman® scorecard box plot showing upregulation of endoderm, mesoderm and ectoderm markers following differentiation.

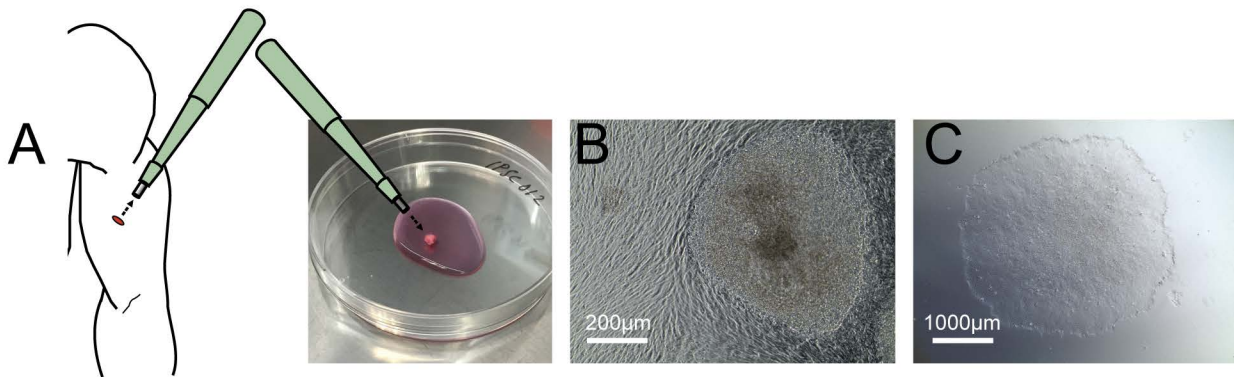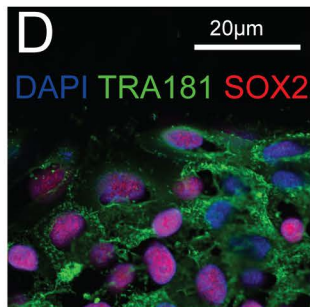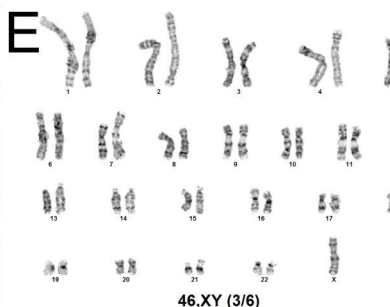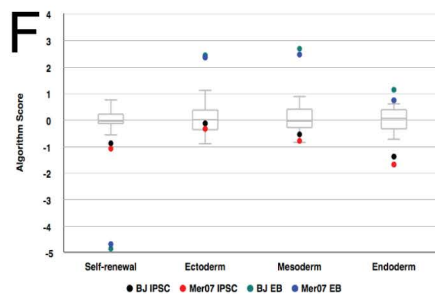

Figure S2. Full length Western blots from Figure 4. In addition to the predicted band for MERTK at approx. 160kDa in all conditions there is a non specific band at 40kDa.

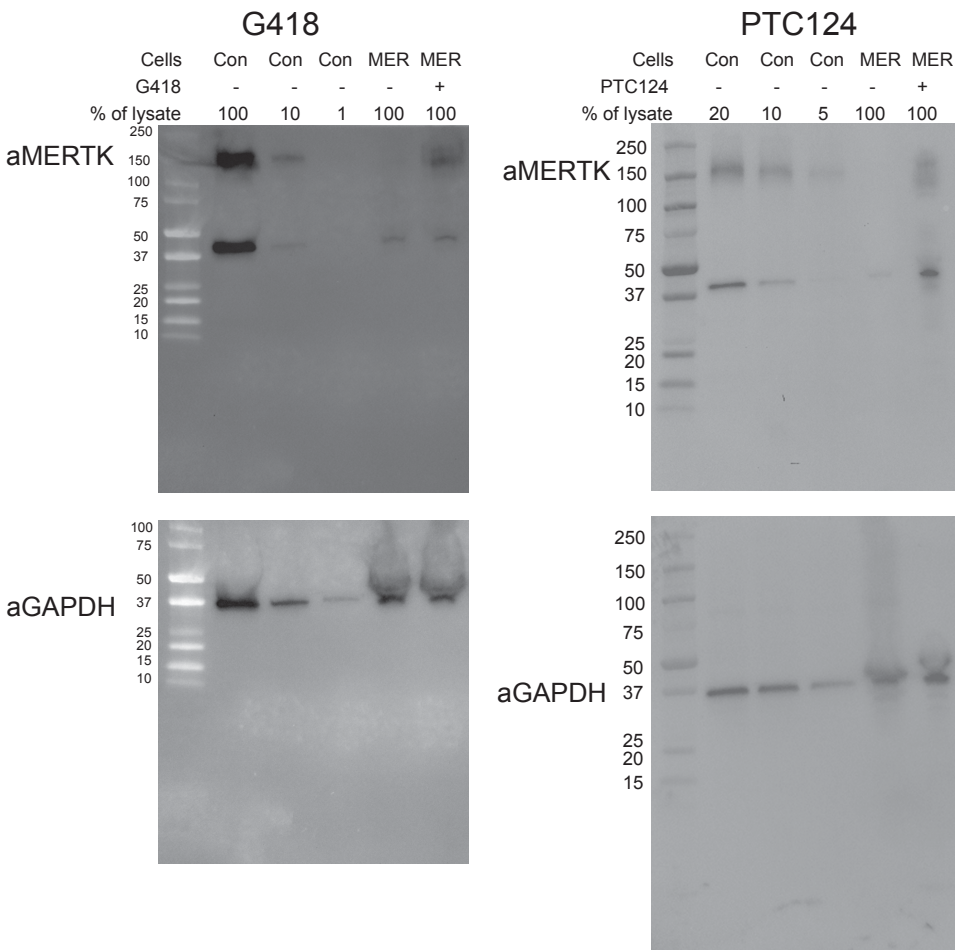

**Figure S3.** Graphical representation of phagocytosis between control RPE and MERTK-RPE at 6 and 20 hours (error bars represent the mean  $\pm$ 1SEM and p value derived from students t-test).

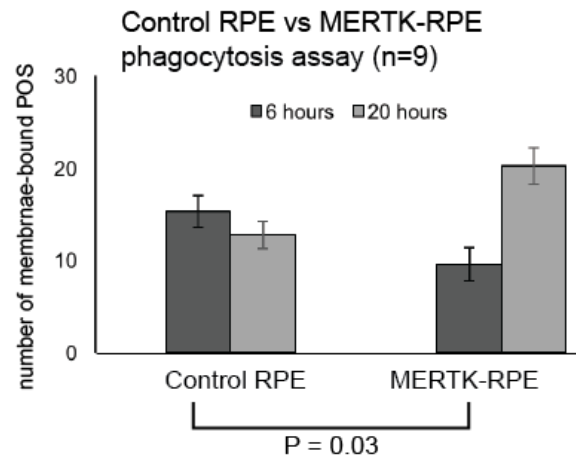

**Table S1.** Details of sequence variants in the *MERTK* gDNA and cDNA.

| Exon | coding position | NCBI reference | <i>MERTK</i> gDNA | <i>MERTK</i> -RPE cDNA | Predicted effect | rs number   | ExAC allele freq |
|------|-----------------|----------------|-------------------|------------------------|------------------|-------------|------------------|
| 9    | 1397            | G              | AG het            | G                      | Missense R466K   | rs7604639   | 0.5972           |
| 10   | 1494            | C              | CT het            | C                      | Synonymous       | rs3811634   | 0.2385           |
| 10   | 1552            | A              | AG het            | A                      | Missense I518V   | rs2230515   | 0.5973           |
| 14   | 1881            | A              | AG het            | A                      | Synonymous       | rs1131244   | 0.5825           |
| 14   | 1951            | C              | CT het            | T                      | Nonsense R651X   | rs119489105 | 4.95E-05         |

**Table S2.** Details of primers used and PCR parameters

| <i>MERTK</i> gDNA sequencing primers | Forward                    | Reverse                   |
|--------------------------------------|----------------------------|---------------------------|
| Exon 9                               | GCCCAGACCTCAGTGTTCATT      | CCCAGGTTACTTCTGGCAATCTG   |
| Exon 10                              | GATCTCTTCGCATGGTCTCAGCTT   | CTTGCAATACCAGTGGGCAAACA   |
| Exon 14                              | ACTAGCCCCTGACAACCACTCATC   | TTTTTCCTTTGGCACAGAGCAGAT  |
| <i>MERTK</i> cDNA sequencing primers |                            |                           |
| Exon 9 & 10                          | ACACCTCTGCCTTACCACATCTGTAC | CTCCTGGACTCTTTTTCTGATGGCC |
| Exon 14                              | GCTCATCATCTTTGGCTGCTTTTGTG | ATATCCACCATGAACTTCAATAGTG |
| RT-PCR primers                       |                            |                           |
| <i>MERTK</i> (exons 1-4)             | GGCGACAGGACAGGTTTCG        | ACTTCGATGTAGATGGGATCAGAC  |
| <i>GAPDH</i>                         | ACAGTCAGCCGCATCTTCTT       | CCCAATACGACCAAATCCGTTG    |

step 1: 95C for 1 min, step 2: 25 cycles of 95C for 30 sec, \*C for 30 sec and 68C for 1 min step 3: 68C for 1 min, where \* is the melting temperature of the primer.

## **Supplementary methods**

### **Karyotype**

Karyotyping was performed by The Doctors Laboratory 76 Wimpole Street, London, W1G 9RT, UK, using standard methods.

### **Scorecard**

Pluripotency potential was measured using TaqMan<sup>®</sup> hPSC Scorecard<sup>™</sup> Assay (A15876, ThermoFisher). Stem cell cultures were split: half frozen in TRIzol (15596, ThermoFisher) after 4 days post passage and half used to make embryoid bodies after 6 days. The embryoid bodies were grown for a further 7 days before harvest (following ThermoFisher publication MAN0008384). After TRIzol RNA extraction, first strand synthesis was performed with the High Capacity cDNA RT Kit with RNaseInhibitor (4374966, ThermoFisher) and qPCR performed in the using TaqMan<sup>®</sup> hPSC Scorecard<sup>™</sup> Panel 96w FAST (A15876, ThermoFisher) using TaqMan<sup>®</sup> Fast Advanced Master Mix (4444557, ThermoFisher). Scorecard analysis was performed using ThermoFisher's cloud based software.
